# Supplementary material for: A database of life-history traits of European amphibians
Source: Biodivers Data J. 2014 Oct 30;(2):e4123. doi: 10.3897/BDJ.2.e4123 (PMC4237922; doi:10.3897/BDJ.2.e4123)
Supplement: Supplementary material 1 — Database for life history traits for European amphibians [file biodiversity_data_journal-2-e4123-s001.xlsx]

## Sheet: Feuil1
	Morphology																																			Life history traits
Traits	Sexual dimorphism	Body mass (in g)				Body length (in mm)									Limb length												Fingers and webbing							Coloration		Activity			Survival rates			Sexual maturity (in years)			Mating systems		Eggs and young
						Snout-to-vent length (in mm)			Total length (in mm)			Proportion head length/body length			Foot length (in mm)			Hind limb length (in mm)			Tibia length (in mm)			Proportion fore limb/hind limb length			Discs	Webbing			Number of toes/fingers		Tubercle														Number of eggs/offspring
Species	Presence of sexual dimorphism	Body mass in males	Body mass in females	Adult body mass	Body mass in juveniles	Snout-to-vent length in males	Snout-to-vent length in females	Adult snout-to-vent length	Total length in males	Total lenght in females	Adult total length	Head length < Body length	Head length = Body length	Head length > Body length	Foot length in males	Foot length in females	Adult foot length	Hind limb length in males	Hind limb length in females	Adult hind limb length	Tibia length in males	Tibia length in females	Adult tibia length	Fore limb length < Hind limb length	Fore limb length = Hind limb length	Fore limb length > Hind limb length	Presence of discs	Presence of webbing	Webbing on toes only	Webbing on fingers and toes	Reduction on fingers only	Reduction on fingers and toes	Presence of metatarsal tubercle	Dorsoseparation	Webbing colour contrast	Diurnal	Nocturnal	Both	Survival rate in adults	Survival rate in juveniles	Survivale rate in tadpoles	Sexual maturity in males	Sexual maturity in females	Adult sexual maturity	Polyandry	Polygyny	Viviparous: number of offspring	Ovoviviparous: number of eggs	Ovoviviparous: number of offspring
Alytes cisternasii	0	DD	DD	5.02	DD	36.748	38.3775	37.5628	37.75	39.83	37.5628	1	0	0	13	12.5	12.75	45	43.5	45.2825	13	13	13.15	1	0	0	0	1	0	1	1	0	1	1	0	0	1	0	DD	DD	DD	DD	DD	2	0	1	0	0	0
Alytes dickhilleni	DD	DD	DD	DD	DD	44.7	DD	47.1667	DD	DD	47.1667	1	0	0	DD	DD	DD	DD	DD	DD	DD	DD	DD	1	0	0	0	1	0	1	1	0	1	DD	DD	0	1	0	DD	DD	DD	DD	DD	2	DD	DD	0	0	0
Alytes muletensis	0	DD	DD	2.31	DD	34.7	35.6545	35.1773	DD	DD	35.1773	1	0	0	DD	DD	DD	DD	DD	DD	DD	DD	DD	1	0	0	0	1	0	1	1	0	1	1	0	0	1	0	DD	DD	DD	DD	DD	3	DD	DD	0	0	0
Alytes obstetricans	0	DD	11.7	11.7	3.5	45.048	49.5725	47.3103	46.15	51.6	47.3103	1	0	0	15.25	15	15.125	54.25	55	58.6125	16	15	17.3775	1	0	0	0	1	0	1	1	0	1	0	0	0	1	0	DD	0.4	DD	DD	DD	2.5	0	1	0	0	0
Anaxyrus americanus	DD	118.7	59.3	60	DD	62.873	76.89	69.8815	64.56	76.89	69.8815	1	0	0	DD	DD	29	DD	DD	DD	DD	53.3333	21	1	0	0	0	1	1	0	1	0	DD	DD	DD	0	1	0	DD	DD	DD	DD	DD	3	DD	DD	DD	DD	DD
Atylodes genei	1	DD	DD	3.91667	DD	53.29	49	51.145	DD	DD	98.235	0	0	1	DD	DD	6.50405	DD	DD	16.3325	DD	DD	DD	0	1	0	0	1	1	0	1	0	0	1	0	0	0	1	DD	DD	DD	DD	DD	DD	DD	DD	0	0	0
Bombina bombina	1	3.17	2.97	3.07	0.87	38.889	39.995	39.442	36.6	36.8	39.442	1	0	0	17	16.3333	16.665	52.3333	51.6667	52	14.3333	14	14.165	1	0	0	0	1	1	0	1	0	0	1	0	1	0	0	DD	DD	DD	1	2	1	0	1	0	0	0
Bombina pachypus	DD	DD	DD	DD	DD	45.75	45.25	45.5	DD	DD	45.5	1	0	0	16	15	15.5	52.5	49	50.75	16	15	15.5	DD	DD	DD	DD	DD	DD	DD	DD	DD	DD	DD	DD	DD	DD	DD	DD	DD	DD	DD	DD	3	DD	DD	DD	DD	DD
Bombina variegata	1	6.56	6.77	6.3166	DD	45.0769	44.34	44.7084	DD	DD	44.7084	1	0	0	DD	DD	DD	DD	DD	DD	DD	DD	DD	1	0	0	0	1	1	0	1	0	1	1	0	1	0	0	0.796	0.04	0.13	DD	DD	1.5	0	1	0	0	0
Bufo bufo	1	41.5	164.75	76.5375	DD	66.107	88.4559	77.2815	62.73	83.17	77.2815	1	0	0	34.67	46.4	40.5335	95.3	138.3	112.65	27	39.2	33.1	1	0	0	0	1	1	0	1	0	1	0	0	0	1	0	0.6	0.1	DD	3	4	3	1	1	0	0	0
Bufo mauritanicus	DD	DD	DD	DD	DD	132	150	141	DD	DD	141	1	0	0	DD	DD	DD	DD	DD	DD	DD	DD	DD	1	0	0	0	1	1	0	1	0	1	DD	DD	0	1	0	DD	DD	DD	DD	DD	DD	DD	DD	DD	DD	DD
Calotriton arnoldi	DD	DD	DD	DD	DD	58.95	58.45	58.7	104.6	104.6	103.95	0	1	0	DD	DD	DD	DD	DD	18.27	DD	DD	DD	0	1	0	0	0	0	0	1	0	0	DD	DD	0	1	0	DD	DD	DD	DD	DD	DD	DD	DD	DD	DD	DD
Calotriton asper	1	7.1	6.13333	6.61667	1.8	64.967	61.667	63.317	112.933	121.008	116.7	0	1	0	DD	DD	DD	18.285	16.505	16.5	DD	DD	DD	0	1	0	0	0	0	0	1	0	0	0	0	0	1	0	DD	DD	DD	3	4	3	DD	DD	0	0	0
Chioglossa lusitanica	1	DD	DD	2	DD	45.085	45.9352	45.5101	156	164	159	0	0	1	DD	DD	DD	12.62	12.6	14.035	DD	DD	DD	0	1	0	0	0	0	0	1	0	0	0	0	0	1	0	DD	DD	DD	DD	DD	4	DD	DD	0	0	0
Discoglossus galganoi	1	21.8	15.2	18.5	DD	54.85	49.2	52.025	50.5	46.5	52.025	1	0	0	DD	DD	DD	DD	DD	DD	DD	DD	DD	1	0	0	0	1	1	0	1	0	1	0	0	0	0	1	DD	DD	DD	5	4	4	1	0	0	0	0
Discoglossus jeanneae	DD	DD	DD	DD	DD	39.5	40.7	40.1	DD	DD	40.1	1	0	0	DD	DD	DD	DD	DD	DD	DD	DD	DD	1	0	0	0	1	1	0	1	0	1	DD	DD	0	0	1	DD	DD	DD	DD	DD	DD	DD	DD	DD	DD	DD
Discoglossus montalentii	1	DD	DD	DD	DD	DD	DD	60	DD	DD	60	1	0	0	DD	DD	DD	DD	DD	DD	DD	DD	DD	1	0	0	0	1	1	0	1	0	1	0	0	0	0	1	DD	DD	DD	DD	DD	DD	DD	DD	0	0	0
Discoglossus pictus	1	22.05	9.65	15.85	DD	56.4917	47.863	52.1773	DD	DD	52.1773	1	0	0	27.25	23.5	25.375	89.75	80	86.6667	29.75	26	28.8333	1	0	0	0	1	1	0	1	0	1	0	0	0	0	1	DD	DD	DD	DD	DD	4	DD	DD	0	0	0
Discoglossus sardus	1	DD	DD	DD	DD	54.6	55.5	55.05	DD	DD	55.05	1	0	0	DD	DD	DD	DD	DD	DD	DD	DD	DD	1	0	0	0	1	1	0	1	0	0	1	0	0	0	1	DD	DD	DD	DD	DD	3	DD	DD	0	0	0
Epidalea calamita	1	46.8125	53.627	50.2197	DD	59.03	67.133	63.0815	72.8818	72.75	63.0815	1	0	0	24	22.33	23.165	68.67	67.67	68.17	20.67	20	20.335	1	0	0	0	1	1	0	1	0	1	1	0	0	1	0	DD	0.22	0.269	3	4	3	0	1	0	0	0
Euproctus montanus	1	DD	DD	2.5	DD	56	58	57	DD	DD	116.5	0	0	1	DD	DD	DD	DD	DD	20.5	DD	DD	DD	0	1	0	0	0	0	0	1	0	0	0	0	0	1	0	DD	DD	DD	3	4	3	DD	DD	0	0	0
Euproctus platycephalus	1	5.1	2.9	4	DD	59.85	43.55	51.7	127	112	120	0	0	1	DD	DD	DD	30.3	25.2	16.5	DD	DD	DD	0	1	0	0	0	0	0	1	0	0	0	0	1	0	0	DD	DD	DD	DD	DD	2.5	DD	DD	0	0	0
Hyla arborea	1	5.35	7.06	6.04325	DD	41.1939	44.0297	42.6118	43.07	44.35	42.6118	1	0	0	17.3333	18.6667	17.9985	58	19.3333	60.835	18	18.6667	19.066	1	0	0	1	1	0	1	1	0	1	1	0	0	0	1	DD	DD	DD	1	2	1	0	1	0	0	0
Hyla intermedia	DD	DD	DD	6.275	DD	38.0306	43.93	40.9803	DD	DD	40.9803	1	0	0	DD	DD	17.138	DD	DD	DD	DD	DD	15.7188	1	0	0	1	1	0	1	1	0	1	DD	DD	0	0	1	DD	DD	DD	1	2	1	0	1	DD	DD	DD
Hyla meridionalis	1	2.65	2.65	3.11	DD	38.593	39.45	39.0215	DD	DD	39.0215	1	0	0	17.3333	17.6667	17.4985	64.3333	65.6667	65.0167	20.3333	17.6667	20.5533	1	0	0	1	1	0	1	1	0	1	1	0	0	1	0	DD	DD	DD	1	2	1	DD	DD	0	0	0
Hyla sarda	1	DD	DD	3.18	DD	DD	DD	35.6	DD	DD	35.6	1	0	0	DD	DD	DD	DD	DD	DD	DD	DD	DD	1	0	0	1	1	0	1	1	0	1	1	0	0	0	1	DD	DD	DD	1	2	1	DD	DD	0	0	0
Lissotriton boscai	1	DD	DD	1.765	DD	32.18	38.118	35.149	66.437	77.204	72.49	0	1	0	DD	DD	DD	DD	DD	13.5	DD	DD	32.94	0	1	0	0	1	1	0	1	0	0	1	0	0	1	0	DD	DD	DD	DD	DD	3	DD	DD	DD	DD	DD
Lissotriton helveticus	1	1.24333	1.45	1.3	DD	34.5	39.6367	37.0683	72	76	77.235	0	1	0	DD	DD	DD	DD	DD	14	DD	DD	DD	0	1	0	0	1	1	0	1	0	0	1	1	0	1	0	0.42	DD	DD	2	5	2	0	1	0	0	0
Lissotriton italicus	1	DD	DD	0.98	DD	DD	DD	DD	DD	80	67.275	0	1	0	DD	DD	DD	DD	DD	DD	DD	DD	DD	0	1	0	0	1	1	0	1	0	0	1	DD	0	1	0	DD	DD	DD	DD	DD	DD	DD	DD	DD	DD	DD
Lissotriton montandoni	1	1.7	2.6	2.15	DD	38.787	45.037	41.912	75	100	83.845	0	1	0	DD	DD	DD	13.4	13.6	14.165	DD	DD	DD	0	1	0	0	1	1	0	1	0	0	DD	DD	0	0	1	DD	DD	DD	DD	DD	3	DD	DD	DD	DD	DD
Lissotriton vulgaris	1	2.26	3.1	2.68125	DD	39.983	41.381	40.682	72	76	84.231	0	1	0	DD	DD	DD	DD	DD	14.5	DD	DD	DD	0	1	0	0	1	1	0	1	0	0	0	1	0	0	1	0.4975	0.8	DD	2.875	3.167	2.875	0	1	0	0	0
Lithobates catesbeianus	1	467.8	403	307.233	26.31	134.74	135.53	135.135	105.3	113.2	135.135	1	0	0	66.3333	65.5556	65.945	186.833	190.556	188.977	55.1667	58.4444	56.8055	1	0	0	0	1	1	0	1	0	1	0	0	0	0	1	DD	DD	0.141667	1.5	2.5	1.5	0	1	0	0	0
Lithobates sylvaticus	DD	11.2	17.6	14.4	DD	53.044	62.315	57.6795	46.05	52.55	57.6795	1	0	0	22.9	27.375	30.8813	72.1	86.1875	95.59	22.6	27.875	29.4937	1	0	0	0	1	1	0	1	0	DD	DD	DD	DD	DD	DD	DD	DD	DD	1	2	1	DD	DD	DD	DD	DD
Lyciasalamandra helverseni	DD	DD	DD	DD	DD	DD	DD	DD	DD	DD	140	0	0	1	DD	DD	DD	DD	DD	DD	DD	DD	DD	0	1	0	0	0	0	0	1	0	0	DD	DD	0	1	0	DD	DD	DD	DD	DD	3	DD	DD	2	0	0
Lyciasalamandra luschani	1	DD	DD	2	2	62.825	61.338	62.0815	126	129	118.65	0	0	1	DD	DD	DD	DD	DD	22.1875	DD	DD	DD	0	1	0	0	0	0	0	1	0	0	1	0	0	0	1	0.79	DD	DD	DD	DD	3	DD	DD	2	0	0
Mesotriton alpestris	1	2.355	3.57	2.9625	DD	45.593	53.84	49.7165	92	120	95.055	0	1	0	DD	DD	DD	DD	DD	17	DD	DD	DD	0	1	0	0	0	0	0	1	0	0	1	0	0	0	1	0.695	0.72	DD	3	4.1	3	0	1	0	0	0
Pelobates cultripes	1	33.1121	40.0443	21.6	DD	65.896	70.175	68.0355	70	80	68.0355	1	0	0	DD	DD	DD	89.3	88	88.65	24.6	24.3	24.5	1	0	0	0	1	1	0	1	0	1 (5mm)	1	0	0	1	0	DD	DD	DD	DD	DD	3	DD	DD	0	0	0
Pelobates fuscus	1	13.2	29.4	21.3	DD	48.9092	57.131	53.0201	45.87	53.89	53.0201	1	0	0	DD	DD	DD	74	82	78	20	23	21.5	1	0	0	0	1	1	0	1	0	1 (6mm)	1	0	0	1	0	0.3445	0.415	DD	DD	DD	1.5	1	1	0	0	0
Pelobates syriacus	1	DD	DD	DD	DD	DD	DD	90	DD	DD	90	1	0	0	DD	DD	DD	DD	DD	DD	DD	DD	DD	1	0	0	0	1	1	0	1	0	1	1	0	0	0	1	DD	DD	DD	2	3	2	DD	DD	0	0	0
Pelodytes ibericus	DD	3.56	4.87	3.98275	DD	35.173	40.72	37.9465	DD	DD	37.9465	1	0	0	DD	DD	DD	DD	DD	55.845	DD	DD	14.842	1	0	0	0	1	1	0	1	0	1	DD	DD	0	0	1	DD	DD	DD	DD	DD	1	DD	DD	DD	DD	DD
Pelodytes punctatus	1	DD	DD	3.03	0.4	36.6695	43.31	45.875	36.32	43.31	45.875	1	0	0	DD	DD	41.43	DD	DD	63.67	16	18	17.6667	1	0	0	0	1	1	0	1	0	1	1	0	0	1	0	DD	DD	0.61	DD	DD	1	DD	DD	0	0	0
Pelophylax bedriagae	1	DD	DD	DD	DD	58.8	61.7	60.25	DD	DD	60.25	1	0	0	28.6	29.9	29.25	DD	DD	DD	26.4	27.8	27.1	1	0	0	0	1	1	0	1	0	DD	DD	DD	1	0	0	DD	DD	DD	2	3	2	DD	DD	DD	DD	DD
Pelophylax bergeri	1	DD	DD	DD	DD	50	57.5	53.75	DD	DD	53.75	1	0	0	DD	DD	DD	DD	DD	DD	DD	DD	DD	1	0	0	0	1	1	0	1	0	1	1	0	0	1	0	DD	DD	DD	DD	DD	DD	DD	DD	DD	DD	DD
Pelophylax cerigensis	DD	DD	DD	DD	DD	DD	DD	62.25	DD	DD	62.25	1	0	0	DD	DD	DD	DD	DD	DD	DD	DD	29.4595	1	0	0	0	1	1	0	1	0	1	DD	DD	DD	DD	DD	DD	DD	DD	DD	DD	DD	DD	DD	DD	DD	DD
Pelophylax cretensis	DD	DD	DD	DD	DD	DD	DD	72.3	DD	DD	72.3	1	0	0	DD	DD	DD	DD	DD	DD	DD	DD	32.7919	1	0	0	0	1	1	0	1	0	1	DD	DD	DD	DD	DD	DD	DD	DD	DD	DD	DD	DD	DD	DD	DD	DD
Pelophylax epeiroticus	1	38.5733	59.0243	48.7988	DD	72.4157	83.9794	78.1976	74.4	83	78.1976	1	0	0	DD	DD	DD	DD	DD	DD	DD	DD	DD	1	0	0	0	1	1	0	1	0	1	1	DD	DD	DD	DD	DD	DD	DD	DD	DD	1	DD	DD	DD	DD	DD
Pelophylax esculentus	1	DD	DD	36.9	1.3	79.71	97.878	88.794	DD	DD	88.794	1	0	0	40.25	50.25	5.375	125.5	159.5	142.75	39	50	44.5	1	0	0	0	1	1	0	1	0	1 (4.44 mm)	1	0	0	1	0	0.615	DD	DD	DD	DD	3	0	1	0	0	0
Pelophylax grafi	1	DD	DD	DD	DD	DD	DD	92.5	DD	DD	92.5	1	0	0	DD	DD	DD	DD	DD	DD	DD	DD	DD	1	0	0	0	1	1	0	1	0	1	1	0	0	0	1	DD	DD	DD	DD	DD	DD	DD	DD	DD	DD	DD
Pelophylax hispanicus	1	DD	DD	DD	DD	DD	DD	100	DD	DD	100	1	0	0	DD	DD	DD	DD	DD	DD	DD	DD	DD	1	0	0	0	1	1	0	1	0	1	1	DD	DD	DD	DD	DD	DD	DD	DD	DD	DD	DD	DD	DD	DD	DD
Pelophylax kurtmuelleri	1	DD	DD	DD	DD	DD	DD	100	DD	DD	100	1	0	0	DD	DD	DD	DD	DD	DD	DD	DD	DD	1	0	0	0	1	1	0	1	0	1	DD	DD	DD	DD	DD	DD	DD	DD	2	3	2	DD	DD	DD	DD	DD
Pelophylax lessonae	1	17.05	19.93	30.8	1.34	54.45	60.248	57.349	DD	DD	57.349	1	0	0	29.6667	33.75	31.7085	85.3333	96.25	90.7917	24	27.5	27.0667	1	0	0	0	1	1	0	1	0	1 (4.125 mm)	1	0	0	0	1	0.78	DD	DD	DD	DD	3	1	1	0	0	0
Pelophylax perezi	1	DD	DD	21.555	DD	50.325	61.597	55.961	52	65.6	55.961	1	0	0	DD	DD	DD	DD	DD	DD	DD	DD	DD	1	0	0	0	1	1	0	1	0	1	1	0	0	0	1	DD	DD	DD	2	3	2	DD	DD	0	0	0
Pelophylax ridibundus	1	29.44	41.61	35.525	DD	72.24	87.879	80.0595	DD	DD	80.0595	1	0	0	29.6667	33.75	DD	85.3	96.25	142.75	24	27.5	42.53	1	0	0	0	1	1	0	1	0	1 (4.36 mm)	1	0	0	0	1	0.7025	DD	DD	2	3	2	0	1	0	0	0
Pelophylax shqipericus	1	DD	DD	DD	DD	70.6	73.8	72.2	70.6	73.8	72.2	1	0	0	DD	DD	DD	DD	DD	DD	DD	DD	DD	1	0	0	0	DD	DD	DD	1	0	1	1	DD	DD	DD	DD	DD	DD	DD	DD	DD	DD	DD	DD	DD	DD	DD
Pleurodeles waltl	1	25.8	24.6	25.2	DD	87.4	82.25	84.825	78.22	142	218.3	0	0	1	DD	DD	DD	40	DD	33.5	DD	DD	DD	0	1	0	0	0	0	0	1	0	0	0	0	0	1	0	DD	DD	DD	DD	DD	1.5	DD	DD	0	0	0
Proteus anguinus	1	DD	DD	13.2	3.65	DD	DD	169.9	DD	DD	257	0	0	1	DD	DD	DD	DD	DD	17.6	DD	DD	DD	0	1	0	0	0	0	0	0	1	0	0	0	0	0	1	DD	DD	DD	11	15	7	DD	DD	0	0	0
Pseudepidalea viridis	1	33	40.73	33.1773	DD	69.9529	78.773	74.3629	DD	DD	74.3629	1	0	0	31.14	31.56	30.53	93.75	91.75	92.75	24.975	24.55	24.46	1	0	0	0	1	1	0	1	0	1	1	0	0	0	1	DD	DD	DD	DD	DD	3	0	1	0	0	0
Rana arvalis	1	DD	DD	10.7975	3.16	57.889	56.483	#DIV/0!	DD	DD	57.186	1	0	0	37.25	33.5	34.125	111.25	91	101.125	34	27.75	30.875	1	0	0	0	1	1	0	1	0	1 (3.625 mm)	1	0	0	0	1	DD	DD	DD	DD	DD	3	1	1	0	0	0
Rana dalmatina	1	10.08	31.9	20.9875	0.43	49.174	64.57	56.872	55.65	64.9	56.872	1	0	0	31.75	38.5	35.125	101.25	125.25	113.25	33.25	42	37.625	1	0	0	0	1	1	0	1	0	1 (3 mm)	1	0	0	0	1	DD	DD	DD	DD	DD	3	1	0	0	0	0
Rana graeca	1	DD	DD	DD	DD	51.75	58	54.875	DD	DD	54.875	1	0	0	29.5	29.5	29.5	98.5	99	98.75	33	29.5	32.25	1	0	0	0	1	1	0	1	0	1 (2.92 mm)	0	DD	0	0	1	DD	DD	DD	DD	DD	3	DD	DD	0	0	0
Rana iberica	1	4.65	7.4	6.025	DD	37.7075	45.085	41.3963	39.13	46.14	41.3963	1	0	0	25	28.5	26.75	76	92	84	24	29.5	26.75	1	0	0	0	1	1	0	1	0	1 (2.125 mm)	1	DD	0	0	1	DD	DD	DD	DD	DD	DD	DD	DD	0	0	0
Rana italica	1	DD	DD	DD	DD	DD	DD	60	DD	DD	60	1	0	0	DD	DD	DD	DD	DD	DD	DD	DD	DD	1	0	0	0	1	1	0	1	0	1	0	DD	0	0	1	DD	DD	DD	DD	DD	DD	DD	DD	DD	DD	DD
Rana latastei	1	DD	DD	DD	DD	42.4222	45.4417	43.9319	DD	DD	43.9319	1	0	0	30	33.67	31.8335	94	107.67	100.835	32	35.3	33.6667	1	0	0	0	1	1	0	1	0	1 (2.33 mm)	1	0	0	0	1	DD	DD	DD	DD	DD	1	DD	DD	0	0	0
Rana pyrenaica	1	DD	DD	DD	DD	38.5	43	40.75	DD	DD	40.75	1	0	0	DD	DD	DD	DD	DD	DD	DD	DD	DD	1	0	0	0	1	1	0	1	0	1	0	0	0	0	1	DD	DD	DD	DD	DD	DD	DD	DD	0	0	0
Rana temporaria	1	38.07	46.4	42.235	0.43	69.4544	70.827	70.1407	67.565	72.3917	70.1407	1	0	0	39.5	42.75	41.125	116.25	128.25	122.25	37	40.75	38.875	1	0	0	0	1	1	0	1	0	1 (3.44 mm)	0	0	0	0	1	DD	0.475	0.06	DD	DD	3	1	1	0	0	0
Salamandra algira	DD	DD	DD	DD	DD	DD	DD	80.2	DD	DD	188.75	0	1	0	DD	DD	DD	DD	DD	DD	DD	DD	DD	0	1	0	0	0	0	0	1	0	0	DD	DD	DD	DD	DD	DD	DD	DD	DD	DD	DD	DD	DD	DD	20	DD
Salamandra atra	1	DD	DD	8.2	DD	66.95	71.225	69.0875	144	151	115.147	0	1	0	DD	DD	DD	DD	DD	23.5	DD	DD	DD	0	1	0	0	0	0	0	1	0	0	0	0	0	1	0	DD	DD	DD	DD	DD	3	1	1	0	50	2
Salamandra corsica	1	DD	DD	DD	DD	DD	DD	DD	180	190	200	0	1	0	DD	DD	DD	DD	DD	DD	DD	DD	DD	0	1	0	0	0	0	0	1	0	0	0	0	0	1	0	DD	DD	DD	DD	DD	6	DD	DD	0	DD	22.5
Salamandra lanzai	1	11.35	13.05	12.2	4.8	82.55	83.675	83.1125	DD	DD	138	0	1	0	DD	DD	DD	DD	DD	DD	DD	DD	DD	0	1	0	0	1	0	1	1	0	0	0	0	0	0	1	DD	DD	DD	5	6	5	DD	DD	0	DD	3
Salamandra salamandra	1	17.9	27.4	35.2263	1.16	129.75	155.25	142.5	DD	DD	175.25	0	1	0	DD	DD	DD	DD	DD	41	DD	DD	DD	0	1	0	0	0	0	0	1	0	0	0	0	0	1	0	0.533333	DD	DD	3	4	3	1	0	0	DD	70
Salamandrina perspicillata	DD	DD	DD	DD	DD	31	40.325	35.6625	DD	DD	92.95	0	1	0	DD	DD	DD	DD	DD	11.5	DD	DD	DD	0	1	0	0	0	0	0	0	1	0	DD	DD	DD	DD	DD	DD	DD	DD	DD	4	4	DD	DD	DD	DD	DD
Salamandrina terdigitata	1	DD	DD	DD	DD	DD	DD	33.309	90	110	94	0	1	0	DD	DD	DD	DD	DD	10.68	DD	DD	DD	0	1	0	0	0	0	0	0	1	0	0	0	0	0	1	DD	DD	DD	DD	DD	DD	DD	DD	0	0	0
Speleomantes ambrosii	1	DD	DD	2.25986	DD	53.31	55.93	54.62	DD	DD	125	0	0	1	DD	DD	6.9042	DD	DD	17.0131	DD	DD	DD	0	1	0	0	1	1	0	1	0	0	0	0	0	0	1	DD	DD	DD	4	5	4	DD	DD	0	0	0
Speleomantes flavus	1	DD	DD	DD	DD	60	63.92	61.96	DD	DD	112.5	0	0	1	DD	DD	9.0905	DD	DD	21.2523	DD	DD	DD	0	1	0	0	1	1	0	1	0	0	0	0	0	0	1	DD	DD	DD	DD	DD	DD	DD	DD	DD	DD	DD
Speleomantes imperialis	1	DD	DD	3.92331	DD	60.85	62.16	61.505	DD	DD	121.605	0	0	1	DD	DD	8.5898	DD	DD	21.0676	DD	DD	DD	0	1	0	0	1	1	0	1	0	0	0	0	0	0	1	DD	DD	DD	DD	DD	DD	DD	DD	DD	DD	DD
Speleomantes italicus	1	DD	DD	2.87679	DD	52.2	56.23	54.215	DD	DD	94.61	0	0	1	DD	DD	6.7204	DD	DD	17.3165	DD	DD	4.81429	0	1	0	0	1	1	0	1	0	0	0	0	0	0	1	DD	DD	DD	DD	DD	3.5	DD	DD	DD	DD	DD
Speleomantes sarrabusensis	DD	DD	DD	DD	DD	DD	DD	DD	DD	DD	DD	0	0	1	DD	DD	DD	DD	DD	DD	DD	DD	DD	0	1	0	0	1	1	0	1	0	0	DD	DD	0	0	1	DD	DD	DD	DD	DD	DD	DD	DD	DD	DD	DD
Speleomantes strinatii	1	DD	DD	DD	DD	58.478	63.5875	61.0328	115	125	119.5	0	0	1	DD	DD	DD	DD	DD	DD	DD	DD	DD	0	1	0	0	1	1	0	1	0	0	0	0	0	0	1	DD	DD	DD	3	5	3	DD	DD	0	0	0
Speleomantes supramontis	1	DD	DD	5.08421	DD	60.47	63.6	62.035	DD	DD	116.585	0	0	1	DD	DD	DD	DD	DD	20.9899	DD	DD	DD	0	1	0	0	1	1	0	1	0	0	0	0	0	0	1	DD	DD	DD	DD	DD	2.5	DD	DD	DD	DD	DD
Triturus carnifex	1	11.4	15.1	8.843	DD	70.1928	72.278	71.2354	DD	DD	144.42	0	1	0	DD	DD	DD	DD	DD	DD	DD	DD	DD	0	1	0	0	0	0	0	1	0	0	1	0	0	1	0	DD	DD	DD	3.2	2.9	2.9	0	1	0	0	0
Triturus cristatus	1	6.975	7.7	7.3375	4.8	64.334	69.276	66.805	140	180	140.05	0	1	0	DD	DD	DD	DD	DD	26.5	DD	DD	DD	0	1	0	0	0	0	0	1	0	0	1	0	0	0	1	0.755	0.26	0.3	2.8	2.67	2.67	0	1	0	0	0
Triturus dobrogicus	1	DD	DD	4.7	DD	62.9944	66.689	64.8417	120	130	132.08	0	1	0	DD	DD	DD	DD	DD	20.01	DD	DD	DD	0	1	0	0	0	0	0	1	0	0	1	DD	DD	DD	DD	0.469	DD	DD	3.2	3.5	3.2	DD	DD	DD	DD	DD
Triturus karelinii	1	DD	DD	DD	DD	68.836	71.123	69.9795	109.209	122.328	136.885	0	1	0	DD	DD	DD	24.034	22.714	25.937	DD	DD	DD	0	1	0	0	0	0	0	1	0	0	1	0	0	1	0	DD	DD	DD	DD	DD	4	DD	DD	DD	DD	DD
Triturus marmoratus	1	8.85	8.97	8.91	DD	65.738	72.426	69.082	132	146	138.3	0	1	0	DD	DD	DD	DD	DD	28	DD	DD	DD	0	1	0	0	0	0	0	1	0	0	0	0	0	0	1	0.771	0.65	DD	4.17	4.4	4.17	DD	DD	0	0	0
Triturus pygmaeus	DD	2.04	2.29	2.937	DD	49.493	43.9	46.6965	DD	DD	101.07	0	1	0	DD	DD	DD	DD	DD	18.55	DD	DD	DD	0	1	0	0	0	0	0	1	0	0	DD	DD	0	1	0	0.73	DD	DD	DD	DD	2	DD	DD	DD	DD	DD
Xenopus laevis	1	26.549	40.28	76.2073	DD	62.49	73.3	67.895	59.9	63.3	67.895	1	0	0	DD	DD	29	DD	DD	DD	DD	DD	22	1	0	0	0	1	1	0	0	1	1	1	0	0	1	0	DD	DD	DD	DD	DD	2	DD	DD	0	0	0
[truncated: 204 more columns]
