# Supplementary material for: A database of life-history traits of European amphibians
Source: Biodivers Data J. 2014 Oct 30;(2):e4123. doi: 10.3897/BDJ.2.e4123 (PMC4237922; doi:10.3897/BDJ.2.e4123)
Supplement: Supplementary material 2 — References cited in the database for life-history traits for European amphibians [file biodiversity_data_journal-2-e4123-s002.xlsx]

## Sheet: Feuil1
Reference number	References
1	Márquez, R. 2009. Sapo partero ibérico – Alytes cisternasii. En: Enciclopedia Virtual de los Vertebrados Españoles. Salvador, A. (Ed.). Museo Nacional de Ciencias Naturales, Madrid. Available from http://www.vertebradosibericos.org/ (accessed Oct 2010)
2	Bosch, J. and R. Márquez. 1996. Discriminant functions for sex identification in two midwife toads (Alytes obstetricans and A. cisternasii). Herpetological Journal 6: 105-109
3	Márquez, R. 1996. Egg Mass and Size of Tadpoles at Hatching in the Midwife Toads Alytes obstetricans and Alytes cisternasii: Implications for Female Choice. Copeia 4: 824-831
4	Arnold, N. and D. Ovenden. 2002. Le guide herpéto: 199 amphibiens et reptiles dʼEurope. Les guides du naturaliste. 288pp. Paris, France
5	Monnet, J.M. and M.I. Cherry. 2002. Sexual size dimorphism in anurans. Proceedings Of The Royal Society Of London Series B-Biological Sciences 269: 2301-2307
6	Boulenger, G.A. 1897. The tailless Batrachians of Europe, Part I. 210pp. London, UK
7	AmphibiaWeb. 2010. Information on amphibian biology and conservation. Berkeley, California: AmphibiaWeb. Available from http://amphibiaweb.org/ (accessed Oct 2010)
8	Salvador, A. 2009. Sapo partero bético – Alytes dickhilleni. En: Enciclopedia Virtual de los Vertebrados Españoles. Salvador, A. (Ed.). Museo Nacional de Ciencias Naturales, Madrid. Available from http://www.vertebradosibericos.org/ (accessed Oct 2010)
9	Dyson, M.L., S.L. Bush and T.R. Halliday. 1998. Phonotaxis by Female Majorcan Midwife Toads, Alytes muletensis. Behaviour 135: 213-230
10	Bosch, J. and R. Márquez. 2000. Tympanum Fluctuating Asymmetry, Body Size and Mate Choice in Female Midwife Toads (Alytes obstetricans). Behaviour 137: 1211-1222
11	Miaud, C. and J. Muratet. 2004. Identifier les œufs et les larves des amphibiens de France. 200pp. Paris, France
12	Salvador, A. 1996. Amphibians of Northwest Africa. Departamento de Ecologia Evolutiva Museo Nacional de Ciencias Naturales 109: 1-41
13	Cistude Nature. 2010. Guide des Amphibiens et Reptiles d’Aquitaine. 180pp. France. Available from http://www.cistude.org (accessed Oct 2010)
14	Weiserbs, A. and J.-P. Jacob. 2005. Amphibiens et Reptiles de la région de Bruxelles-Capitale. 107pp. Bruxelles, Belgium
15	Agence de lʼeau Artois Picardie. 2003. Partez à la rencontre de la biodiversité: les amphibiens et les reptiles liés à lʼeau du bassin Artois-Picardie. 36pp. France
16	Laan, R. and B. Verboom. 1986. Nieuwe poelen voor amfibieên; Aanbevelingen voor aanleg en onderhoud. Report 269, Department of Animal Ecology, Nijmegen University and of Research Institute for Nature Management. Nijmegen, The Netherlands
17	Bosch, J. 2009. Sapo partero común – Alytes obstetricans. En: Enciclopedia Virtual de los Vertebrados Españoles. Salvador, A. (Ed.). Museo Nacional de Ciencias Naturales, Madrid. Available from http://www.vertebradosibericos.org/ (accessed Oct 2010)
18	Cogalniceanu, D. and C. Miaud. 2003. Population age structure and growth of four syntopic amphibian species inhabiting a large river floodplain. Canadian Journal of Zoology 81: 1096-1106
19	Kovar, R., M. Brabec, R. Vita and R. Bocek. 2009. Spring migration distances of some Central European amphibian species. Amphibia- Reptilia 30: 367-378
20	Cogalniceanu, D. and C. Miaud. 2003. Variation in life history traits in Bombina bombina from the lower Danube floodplain. Amphibia-Reptilia 25: 115-119
21	Szymura, J.M. and N.H. Barton. 1986. Genetic Analysis of a Hybrid Zone Between the Fire-Bellied Toads, Bombina bombina and B. variegata, Near Cracow in Southern Poland. Evolution 40: 1141-1159
22	Pichenot, J. 2008. Contribution à la Biologie de la Conservation du Sonneur à ventre jaune (Bombina variegata L.) Écologie spatiale et approche multi-échelles de la sélection de l’habitat en limite septentrionale de son aire de répartition. Thesis. 191pp. France
23	Vukov, T.D., G. Dzukic, S. Lelo, L.J. Borkin, S.N. Litvinchuk and M.L. Kalezic. 2006. Morphometrics of the yellow-bellied toad (Bombina variegata) in the Central Balkans: implications for taxonomy and zoogeography. Zoological Studies 45: 213-222
24	Seidel, B. 1999. Water-wave Communication between Territorial Male Bombina variegata (L.) 1758 (Anura:Bombinatoridae). Journal of Herpetology 33: 457-462
25	Morand, A. 1997. Stabilité relative des habitats de développement larvaire et de reproduction de Bombina variegata et Bufo calamita: lʼinsuffisance des Modèles r-K et r-K-A. Geobios 30: 23-36
26	Collectif de l’Acemav. 2003. Les amphibiens de France, Belgique et Luxembourg. Collection Parthénope. 480pp. Mèze, France
27	Beshkov, V.A. and D.L. Jameson. 1980. Movement and abundance of the yellow-bellied toad Bombina variegata. Herpetologica 36: 365-370
28	Barandun, J. and H.U. Reyer. 1998. Reproductive ecology of Bombina variegata: Habitat use. Copeia 2: 297-500
29	Hartel, T. 2008. Movement activity in a Bombina variegata population from a deciduous forested landscape. North-Western Journal of Zoology 4: 79-90
30	Cabela, A. and L. Girolla. 1994. Die Erstbesiedlung des Marchfeldkanals durch Amphibien. Herpetozoa 7: 109-138
31	Herrmann, D. 1996. Aktionsraum und Biotopverbund in südniedersächsischen Gelbbauchunken-Populationen. Naturschutzreport 11: 63-68
32	Abbühl, R. and H. Durrer. 1996. Habitatpräferenz und Migrationsverhalten bei der Gelbbauchunke (Bombina variegata variegata) in einer seminatürlichen Versuchsanlage. Salamandra 32: 23-30
33	Jehle, R. and U. Sinsch. 2007. Wanderleistung und Orientierung von Amphibien: eine Übersicht. Zeitschrift für Feldherpetologie 14: 137-152
34	Gittins, S.P. 1983. Population dynamics of the common toad (Bufo bufo) at a lake in Mid-Wales. Journal of Animal Ecology 52: 981-988
35	Vignes, J.C. 2009. Quelques caractéristiques biologiques de la reproduction du Crapaud commun (Bufo bufo L .) au Pays Basque. Munibe (Ciencias Naturales-Natur Zientziak) 57: 147-162
36	Jovanovic, M. 2009. Amphibia and Reptilia of Stoj plao (Ulcinj, Montenegro). Bulletin of the Natural History Museum 2: 137-152
37	Haapanen, A. 1974. Site tenacity of the common toad, Bufo bufo (L). Annales Zoologici Fennici 11: 251-252
38	Heusser, H. 1969. Die lebensweise der erdkrote (Bufo bufo L.). Das orientierungsproblem. Revue suisse de zoologie 76: 444-517
39	Moore, H.J. 1954. Some observations on the migration of the toad, (Bufo b. bufo). British Journal of Herpetology 1: 194-224
40	Parker, A.G. and S.P. Gittins. 1979. A note on home range in the common toad in mid-Wales and a method for tracking toads for behavioural observation. British Journal of Herpetology 6: 7-8
41	Sinsch, U. 1989. Migratory behaviour of the common toad Bufo bufo and the natterjack toad Bufo calamita. Amphibians and roads proceedings of the toad tunnel conference 113-125
42	Reading, C.J., J. Loman and T. Madsen. 1991. Breeding pond fidelity in common toads, Bufo bufo. Journal of Zoology 225: 201-211
43	Sinsch, U. 1988. Seasonal changes in the migratory behaviour of the toad Bufo bufo : direction and magnitude of movements. Oecologia 78: 390-398
44	Baker, J.M.R. and T.R. Halliday. 1999. Amphibian colonization of new ponds in an agricultural landscape. Herpetological Journal 9: 55-63
45	Tomašević, N., D. Cvetković, C. Miaud, I. Aleksić and J. Crnobrnja-Isailović. 2008. Interannual variation in life history traits between neighbouring populations of the widespread amphibian Bufo bufo. Revue d’Écologie (la Terre and la Vie) 63: 371-381
46	Hettyey, A., J. Török and G. Hévizi. 2005. Male Mate Choice Lacking in the Agile Frog, Rana dalmatina. Society 2: 403-408
47	Natura&Biodiversité. 2011. La Roche-sur-Yon. France. Available from http://biodiversite.ville-larochesuryon.fr (accessed Oct 2010)
48	Vaucher, P.Y. 2011. Batraciens et Reptiles du Monde. Depot.com and IDDN Certification. Available from http://www.batraciens-reptiles.com/ (accessed Oct 2010)
49	Martínez-Solano, I. 2009. Sapillo pintojo ibérico - Discoglossus galganoi. En: Enciclopedia Virtual de los Vertebrados Españoles. Museo Nacional de Ciencias Naturales, Madrid. Available from http://www.vertebradosibericos.org/ (accessed Oct 2010)
50	Martínez-Solano, I. 2009. Sapillo pintojo meridional – Discoglossus jeanneae. En: Enciclopedia Virtual de los Vertebrados Españoles. Museo Nacional de Ciencias Naturales, Madrid. Available from http://www.vertebradosibericos.org/ (accessed Oct 2010)
51	Nöllert, A. and C. Nöllert. 2003. Guide des Amphibiens d’Europe : biologie, identification et répartition. 299pp. Paris, France
52	Bensettiti, F. and V. Gaudillat. 2004. Cahiers dʼhabitats Natura 2000. Connaissance et gestion des habitats et des espèces d'intérêt communautaire. Tome 7 : Espèces animales. 353pp. Paris, France
53	Brunet, P., D. Sanuy, N. Oromí, M. Ait Hammou and W. Dahmani. 2009. Anuran Studies from Tiaret region, north-west of Algeria. Boletín de la Asociación Herpetológica Española 20: 68-72
54	Montori, A., G.A. Llorente, A. Richter-Boix, D. Villero, M. Franch and N. Garriga. 2007. Potential effects of the invasive Discoglossus pictus on native species. Munibe society of science 25: 14-27
55	Martínez-Solano, I. 2009. Sapillo pintojo mediterráneo – Discoglossus pictus. En: Enciclopedia Virtual de los Vertebrados Españoles. Museo Nacional de Ciencias Naturales, Madrid. Available from http://www.vertebradosibericos.org/ (accessed Oct 2010)
56	Grillas, P., P. Gauthier, N. Yavercovski and C. Perennou. 2004. Les mares temporaires méditerranéennes volume 2 fiches espèces. Station biologique de la Tour du Valat. 130pp. France
57	Grossenbacher, K. and W. Böhme. 2009. Handbuch der Reptilien und Amphibien Europas, Band 5/II. 503pp
58	Boulenger, G.A. 1897. The tailless Batrachians of Europe, Part II. 200 pp. London, UK
59	Jacob, J.-P., C. Percsy, H. de Wavrin, E. Graitson, T. Kinet, M. Denoël, M. Paquay, N. Percsy and A. Remacle. 2007. Amphibiens et Reptiles de Wallonie. Aves – Raînne et Centre de Recherche de la Nature, des Forêts et du Bois (MRW - DGRNE), Série « Faune - Flore - Habitats » n° 2. 384pp. Namur, France
60	Miaud, C., D. Sanuy, and J.N. Avrillier. 2000. Terrestrial movements of the natterjack toad Bufo calamita (Amphibia, Anura) in a semi-arid, agricultural landscape. Amphibia-Reptilia 21: 357-369
61	Sinsch, U. 1988. Temporal Spacing of Breeding Activity in the Natterjack Toad, Bufo calamita. Oecologia 76: 399-407
62	Sinsch, U. 1997. Postmetamorphic dispersal and recruitment of first breeders in a Bufo calamita metapopulation. Oecologia 112: 42-47
63	Sinsch, U. 1992. Structure and dynamic of a natterjack toad metapopulation (Bufo calamita). Oecologia 112: 489-499
64	Gómez-Mestre, I. 2009. Sapo corredor – Epidalea calamita. En: Enciclopedia Virtual de los Vertebrados Españoles. Museo Nacional de Ciencias Naturales, Madrid. Available from http://www.vertebradosibericos.org/ (accessed Oct 2010)
65	Husté, A., J. Clobert and C. Miaud. 2006. The movements and breeding site fidelity of the natterjack toad (Bufo calamita) in an urban park near Paris (France) with management recommendations. Amphibia-Reptilia 27: 561-568
66	Meuche, I. and T. Grafe. 2009. Supplementary feeding affects the breeding behaviour of male European treefrogs (Hyla arborea). BMC ecology 9: 1-7
67	Stumpel, A.H.P. and G. Hanekamp. 1986. Habitat and ecology of Hyla arborea in The Netherlands. Pages 409-412 In Z. Rocek, editors. Studies in Herpetology. Charles University, Prague, Czech Republic
68	Vos, C.C., C.J.F. Ter Braak and W. Nieuwenhuizen. 2000. Incidence Function Modelling and Conservation of the Tree Frog Hyla arborea in the Netherlands. Ecological Bulletins 48: 165-180
69	Carlson, A. and P. Edenhamn. 2000. Extinction Dynamics and the Regional Persistence of a Tree Frog Metapopulation. Proceedings of the Royal Society B: Biological Sciences 267: 1311-1313
70	Clausnitzer, C. and H.J. Clausnitzer. 1984. First results of a repopulation of the tree frog Hyla arborea in the district of Celle, Lower Saxony, West Germany. Salamandra 20: 50-55
71	Fog, K. 1993. Migration in the tree frog Hyla arborea. In Ecology and conservation of the European tree frog. DLO Institute for Forestry and Nature Research: Wageningen, The Netherlands
72	Pellet, J., L. Rechsteiner, A.K. Skrivervik, J.-F. Zürcher and N. Perrin. 2006. Use of the Harmonic Direction Finder to study the terrestrial habitats of the European tree frog (Hyla arborea). Amphibia-Reptilia 27: 138-142(2006).
73	Márquez, R. and M. Tejedo-Madueno. 1990. Size-based mating pattern in the tree-frog Hyla arborea. Herpetologica 46: 176-182
74	Rosso, A., S. Castellano, and C. Giacoma. 2004. Ecogeographic analysis of morphological and life-history variation in the Italian treefrog. Evolutionary Ecology 18: 303-321
75	Sillero, N. 2009. Ranita meridional – Hyla meridionalis. En: Enciclopedia Virtual de los Vertebrados Españoles. Museo Nacional de Ciencias Naturales, Madrid. Available from http://www.vertebradosibericos.org/ (accessed Oct 2010)
76	Ingram, W.M. and E.C. Raney. 1943. Additional studies on the movement of tagged bullfrogs, Rana catesbeiana Shaw. American Midland Naturalist 29: 239-241
77	Raney, E.C. 1940. Summer movements of the bullfrog, Rana catesbeiana Shaw, as determined by the jaw-tag method. American Midland Naturalist 23: 733-745
78	Willis, Y.L., P.B. Moyle and T.S. Baskett. 1956. Emergence, breeding, hibernation, movements, and transformation of bullfrog, Rana catesbeiana, in Missouri. Copeia 1956: 30-35
79	Boulenger, G.A. 1920. A Monograph of the American Frogs of the Genus Rana. Proceedings of the American Academy of Arts and Sciences 55: 413-480
80	Boyd, S.K., K.D. Wissing, J.E. Heinsz and G. S. Prins. 1999. Androgen receptors and sexual dimorphisms in the larynx of the bullfrog. General and Comparative Endocrinology 113: 59-68
81	Coïc, C. and M. Détaint. 2001. Invasion de la grenouille taureau (Rana catesbeiana Shaw) en France : Synthèse bibliographique - suivi 2000-2001 - perspectives. 30pp. Cistude Nature. France
82	Recuero, E. 2010. Sapo de espuelas – Pelobates cultripes. En: Enciclopedia Virtual de los Vertebrados Españoles. Museo Nacional de Ciencias Naturales, Madrid. Available from http://www.vertebradosibericos.org/ (accessed Oct 2010)
83	Leclair, M.H., J.R. Leclair and J. Gallant. 2005. Application of skeletochronology to a population of Pelobates cultripes (Anura: Pelobatidae) from Portugal. Journal of Herpetology 39: 199-205
84	Hels, T. 2002. Population dynamics in a Danish metapopulation of spadefoot toads Pelobates fuscus. Ecography 25: 303-313
85	Jehle, R., W. Hödl and A. Thonke. 1995. Structure and dynamics of central European amphibian populations: A comparison between Triturus dobrogicus (Amphibia, Urodela) and Pelobates fuscus (Amphibia, Anura). Australian Journal of Ecology 20, 362-366
86	Graitson E. and J.-P. Jacob (Aves). 2004. Système dʼinformations sur la Biodiversité en Wallonie, observatoire de la Faune, de la Flore et des Habitats. 2011. Available from http://old.biodiversite.wallonie.be/ (accessed Oct 2010)
87	Eggert, C. 2002. Use of fluorescent pigments and implantable transmitters to track a fossorial toad (Pelobates fuscus). Herpetological Journal 12: 69-74
88	Reques, R. 2009. Sapillo moteado ibérico – Pelodytes ibericus. En: Enciclopedia Virtual de los Vertebrados Españoles. Museo Nacional de Ciencias Naturales, Madrid. Available from http://www.vertebradosibericos.org/ (accessed Oct 2010)
89	Sánchez-Herráiz, M.J., L.J. Barbadillo, A. Machordom and B. Sanchiz. 2000. A new species of pelodytid frog from the Iberian Peninsula. Herpetologica 56: 105-118
90	Disi, A.M. and Z.S. Amr. 2010. Morphometrics, distribution and ecology of the amphibians in Jordan. Vertebrate Zoology 60: 147-162
91	Beerli, P. 1994. Rana cerigensis Beerli, Hotz, Tunner, Heppich, and Uzzell. Version 20 December 1995 (under construction). Available from http://tolweb.org/Rana_cerigensis/17503/1995.12.20 in The Tree of Life Web Project (accessed Oct 2010)
92	Beerli, P. 1994. Rana cretensis Beerli, Hotz, Tunner, Heppich, and Uzzell. Version 20 December 1995 (under construction). Available from http://tolweb.org/Rana_cretensis/17501/1995.12.20 in The Tree of Life Web Project (accessed Oct 2010)
93	Tsiora, A. and P. Kyriakopoulou-Sklavounou. 2002. A skeletochronological study of age and growth in relation to adult size in the water frog Rana epeirotica. Zoology 105: 55-60
94	Tsiora, A. and P. Kyriakopoulou-Sklavounou. 2002. Female reproductive cycle of the water frog Rana epeirotica in northwestern Greece. Amphibia-Reptilia 23: 269-280
95	Tsiora, A. and P. Kyriakopoulou-Sklavounou. 2001. Male reproductive cycle of the water frog Rana epeirotica in northwestern Greece. Amphibia-Reptilia 22: 291-302
96	Beerli, P. 1995. Rana epeirotica. Version 20 December 1995 (under construction). Available from http://tolweb.org/Rana_epeirotica/17495/1995.12.20 in The Tree of Life Web (accessed Oct 2010)
97	Jean, T. 2007. Document pour l’étude et la détermination des Amphibiens du Massif armoricain. CPN des Sittelles (Connaître et Protéger la Nature). 20pp. France
98	Tunner, H.G. 1992. Locomotion behavior in water frogs from Neusiedlersee. In Z. Koros and I. Kiss, editors. Proceeding of the sixth ordinary general meeting of the Society for European Herpetologists. Hungarian Natural History Museum.
99	Krizmanić, I. 2008. Basic morphological characteristics of the Rana (Pelophylax) synklepton esculenta complex in relation to legal regulations in Serbia. Archives of Biological Sciences (Belgrade) 60: 629-639
100	Tryjanowski, P., T. Sparks, M. Rybacki and L. Berger. 2006. Is body size of the water frog Rana esculenta complex responding to climate change? Naturwissenschaften 93: 110-113
101	Altwegg, R. and H.U. Reyer. 2003. Patterns of natural selection on size at metamorphosis in water frogs. Evolution 57: 872-882
102	Holenweg Peter, A.-K. 2001. Dispersal rates and distances in adult water frogs, Rana lessonae, R. ridibunda and their hybridogenetic associate R. esculenta. Herpetologica 57: 449-460
103	Holenweg Peter, A.-K. 2001. Survival in adults of the water frog Rana lessonae and its hybridogenetic associate Rana esculenta. Canadian Journal of Zoology 79: 652-661
104	Sjögren, P. 1988. Metapopulation biology of Rana lessonae Camerano on the northern periphery of its range. 35pp. Dissertation. Uppsala University, Uppsala, Sweden
105	Sjögren Gulve, P. 1998. Spatial movement patterns in frogs: target-oriented dispersal in the pool frog, Rana lessonae. Ecoscience 5: 31-38
106	Egea-Serrano, A. 2009. Rana común – Pelophylax perezi. En: Enciclopedia Virtual de los Vertebrados Españoles. Museo Nacional de Ciencias Naturales, Madrid. Available from http://www.vertebradosibericos.org/ (accessed Oct 2010)
107	Kyriakopoulou-Sklavounou, P. and N. Loumbourdis. 1990. Annual ovarian cycle in the frog Rana ridibunda in Northern Greece. Journal of Herpetology 24: 185-191
108	Kyriakopoulou-Sklavounou, P., S. Panagiota and A. Tsiora. 2008. A skeletochronological study of age, growth and longevity in a population of the frog Rana ridibunda from southern Europe. Zoology 111: 30-36
109	Yilmaz, N., B. Kutrup, U. Çobanoglu and Y. Özoran. 2005. Age determination and some growth parameters of a Rana ridibunda population in Turkey. Acta Zoologica Academiae Scientiarum Hungaricae 51: 67-74
110	Arıkan, H., K. Olgun, I.E. Çevik and C.V.A. Tok. 1998. Taxonomical Study on the Rana ridibunda PALLAS, 1771 (Anura: Ranidae) Population from Ivriz-Eregli (Konya). Turkish Journal of Zoology 22: 181-184
111	Budak, A., C.V. Tok, and D. Ayaz. 2000. On specimens of Rana ridibunda Pallas, 1771 (Anura: Ranidae) Collected from Işıklı Lake (Çivril-Denizli). Turkish Journal of Zoology 24: 135-137
112	Ayaz, D., C. V. Tok, A. Mermer, M. Tosunoğlu, M. Afsar and K. Çiçek. 2006. A New Locality for Rana ridibunda caralitana Arıkan, 1988 (Anura: Ranidae) in the Central Anatolia. EU Journal of Fisheries and Aquatic Sciences 23: 181-183
113	Beerli, P. 1995. Rana shqiperica Hotz, Uzzell, Günther, Tunner and Heppich 1987. Version 20 December 1995 (under construction). Available from http://tolweb.org/Rana_shqiperica/17497/1995.12.20 in The Tree of Life Web Project (accessed Oct 2010)
114	Salvador, A. 2009. Sapo balear – Pseudepidalea balearica. En: Enciclopedia Virtual de los Vertebrados Españoles. Museo Nacional de Ciencias Naturales, Madrid. Available from http://www.vertebradosibericos.org/ (accessed Oct 2010)
115	Kutrup, B., U. Bülbül and N. Yilmaz. 2006. Effects of the ecological conditions on morphological variations of the green toad, Bufo viridis, in Turkey. Ecological Research, Melbourne 21: 208-214
116	Hoffman, J. and U. Katz. 1997. Salt and water balance in the toad Bufo viridis during recovery from two different osmotically stressful conditions. Comparative Biochemistry and Physiology Part A: Molecular and Integrative Physiology 117: 147-154
117	Karakousis, Y. and P. Kyriakopoulou-Sklavounou.1995. Genetic and Morphological Differentiation among Populations of the Green Toad Bufo viridis from Northern Greece. Biochemical Systematics and Ecology 23: 39-45
118	Castellano, S. and C. Giacoma. 1998. Morphological variation of the green toad, Bufo viridis, in Italy; a test of causation. Journal of Herpetology 32: 540-550
119	Castellano, S., M. Cucco and C. Giacoma. 2004. Reproductive investment of female green toads (Bufo viridis). Copeia 2004, 659-664
120	Haapanen, A. 1970. Site tenacity of the common frog Rana temporaria L. and the moor frog Rana arvalis Nilss. Annales Zoologici Fennici 7: 61-66
121	Lodé, T. 1993. Rythme dʼactivité et déplacements chez la Grenouille agile Rana dalmatina Bonaparte 1840. Bulletin Société Herpétologique de France 67-68: 13-22
122	Ponsero, A. and P. Joly. 1998. Clutch size, egg survival and migration distance in the agile frog (Rana dalmatina) in a floodplain. Archiv für Hydrobiologie 142: 343-352
123	Weddeling, K., G. Bosbach, M. Hatchel, U. Sander, P. Schmidt and D. Tarkhnishvili. 2005. Egg size versus clutch size: variation and trade-offs in reproductive output of Rana dalmatina and R. temporaria in a pond near Bonn (Germany). Pages 238 – 240 In N. Ananjeva and O. Tsinenko, editors. Herpetologia Petropolitana. St. Petersburg, Russia
124	Salvador, A. 2009. Rana patilarga – Rana iberica. En: Enciclopedia Virtual de los Vertebrados Españoles. Museo Nacional de Ciencias Naturales, Madrid. Available from http://www.vertebradosibericos.org/ (accessed Oct 2010)
125	Guarino, F.M., S. Lunardi, M. Carlomagno and S.A. Mazzoti. 2003. A skeletochronological study of growth, longevity and age at sexual maturity in a population of Rana latastei (Amphibia, Anura). Journal of Biosciences 28: 775-782
126	Pellitteri-Rosa, D., A. Gentilli, R. Sacchi, S. Scali, F. Pupin, E. Razzetti, F. Bernini and M. Fasola. 2008. Factors affecting repatriation success of the endangered Italian agile frog (Rana latastei). Amphibia-Reptilia 29: 235-244
127	Serra-Cobo, J., G. Lacroix, and S. White. 1998. Comparison between the ecology of the new European frog Rana pyrenaica and that of four Pyrenean amphibians. Journal of Zoology 246: 147-154
128	Vieites, D.R. and M. Vences. 2007. Rana pirenaica – Rana pyrenaica. En: Enciclopedia Virtual de los Vertebrados Españoles. Museo Nacional de Ciencias Naturales, Madrid. Available from http://www.vertebradosibericos.org/ (accessed Oct 2010)
129	Seitz, A., U. Faller-Doepner and W. Reh. 1992. Radio-tracking of the common frog (Rana temporaria). Pages 484-489. In I.G. Priede and S.M. Swift, editors. Wildlife Telemetry: Remote Monitoring and Tracking of Animals. Ellis Horwood Ltd, Chichester, UK
130	Cummins, C.P. 1986. Temporal and spatial variation in egg size and fecundity in Rana temporaria. Journal of Animal Ecology 55: 303-316
131	Alho, J.S., G. Herczeg, and J. Merilä. 2008. Female-biased sex ratios in subarctic common frogs. Journal of Zoology 275: 57-63
132	Morrison, C. and J.M. Hero. 2003. Geographic variation in life history characteristics of amphibians: a review. Journal of Animal Ecology 72: 270-279
133	Lesbarrères, D., D.S. Schmeller, C.R. Primmer and J. Merilä. 2007. Genetic variability predicts common frog (Rana temporaria) size at metamorphosis in the wild. Heredity 99: 41-46
134	Safner, T., C. Miaud, O. Gaggiotti, S. Decout, D. Rioux, S. Zundel and S. Manel. 2010. Combining demography and genetic analysis to assess the population structure of an amphibian in a human-dominated landscape. Conservation Genetics 12: 161-173
135	Smith, E.E., L.H. du Preez, B.A. Gentles, K.R. Solomon, B. Tandler, J.A. Carr, G.J. Van Der Kraak, R.J. Kendall, J.P. Giesy and T.S. Gross. 2005. Assessment of laryngeal muscle and testicular cell types in Xenopus laevis (Anura Pipidae) inhabiting maize and non-maize growing areas of South Africa. African Journal of Herpetology 54: 69-76
136	Measey, G.J. and R.C. Tinsley. 1998. Feral Xenopus Laevis in South Wales. Herpetological Journal 8: 23-27
137	Richards, C.T. 2010. Kinematics and hydrodynamics analysis of swimming anurans reveals striking inter-specific differences in the mechanism for producing thrust. The Journal of experimental biology 213: 621-634
138	Renzo, S. and , S. Giuliana. 1966. Lʼoviparitàt in Hydromantes genei (Temm, e Schl). Italian Journal of Zoology 33: 283-291
139	Lanza, B., V. Caputo, G. Nascetti and L. Bullini. 1995. Morphologic and genetic studies on the European plethodontid salamanders: taxonomic inferences (genus Hydromantes). Monografie XVI, Museo Regionale di Scienze Naturali, Torino, Italy
140	Raffaëlli, J. 2007. Les Urodèles du monde. 377pp. France
141	Wiens, J.J. and J.T. Hoverman. 2008. Digit reduction, body size, and paedomorphosis in salamanders. Evolution and Development 10: 449-463
142	Boulenger, G.A. 1882. Catalogue of the Batrachia Gradientia s. Caudata and Batrachia Apoda in the collection of the British Museum, ed. 2. 127pp. London, UK
143	Amat, F. and S. Carranza. 2006. Tritón del Montseny - Calotriton arnoldi. En: Enciclopedia Virtual de los Vertebrados Españoles. Museo Nacional de Ciencias Naturales, Madrid. Available from http://www.vertebradosibericos.org/ (accessed Oct 2010)
144	Carranza, S. and F. Amat. 2005. Taxonomy, biogeography and evolution of Euproctus (Amphibia : Salamandridae), with the resurrection of the genus Calotriton and the description of a new endemic species from the Iberian Peninsula. Zoological Journal of the Linnean Society 145: 555-582
145	Montori, A. and G.A. Llorente. 2009. Tritón pirenaico – Calotriton asper. En: Enciclopedia Virtual de los Vertebrados Españoles. Museo Nacional de Ciencias Naturales, Madrid. Available from http://www.vertebradosibericos.org/ (accessed Oct 2010)
146	Issartel, J., Y. Voituron, O. Guillaume, J. Clobert and F. Hervant. 2010. Selection of physiological and metabolic adaptations to food deprivation in the Pyrenean newt Calotriton asper during cave colonisation. Comparative biochemistry and physiology. Part A, Molecular and integrative physiology 155: 77-83
147	Miaud, C. and O. Guillaume. 2005. Variation in Age, Body Size and Growth Among Surface and Cave-Dwelling Populations of the Pyrenean Newt, Euproctus Asper (Amphibia; Urodela). Herpetologica 61: 241-249
148	Hervant, F., J. Mathieu and J.P. Durand. 2001. Behavioural, physiological and metabolic responses to long-term starvation and refeeding in a blind cave-dwelling salamander (Proteus anguinus) and a facultative cave-dwelling newt (Euproctus asper). Journal of Experimental Biology 204: 269-281
149	Hervant, F., J. Mathieu and J.P. Durand. 2000. Metabolism and circadian rhythm in the European blind cave salamander (Proteus anguinus) and a facultative cave dweller, the Pyrenean newt (Euproctus asper). Canadian Journal of Zoology 78: 1427-1432
150	Dreiss, A.N., O. Guillaume and J. Clobert. 2009. Diverging Cave- and River-Dwelling Newts Exert the Same Mate Preference in their Native Light Conditions. Ethology 115: 1036-1045
151	Losange. 2008. Amphibiens et reptiles. 125pp. Artémis Editions. France
152	Montori, A., G.A. Llorente and A. Richter-Boix. 2008. Habitat features affecting the small-scale distribution and longitudinal migration patterns of Calotriton asper in a Pre-Pyrenean population. Amphibia-Reptilia 29: 371-381
153	Vences, M. 2009. Salamandra rabilarga – Chioglossa lusitanica. En: Enciclopedia Virtual de los Vertebrados Españoles. Museo Nacional de Ciencias Naturales, Madrid. Available from http://www.vertebradosibericos.org/ (accessed Oct 2010)
154	Arntzen, J.W., D.S.J. Groenenberg, J. Alexandrino, N. Ferrand and F. Sequeira. 2007. Geographical variation in the golden-striped salamander, Chioglossa lusitanica Bocage, 1864 and the description of a newly recognized subspecies. Journal of Natural History 41: 925-936
155	Alexandrino, J., N. Ferrand and J.W. Arntzen. 2005. Morphological variation in two genetically distinct groups of the golden-striped salamander, Chioglossa lusitanica (Amphibia : Urodela ). Contributions to Zoology 74: 213-222
156	Sequeira, F., N.M. Ferrand, and E.G. Crespo. 2003. Reproductive cycle of the golden-striped salamander Chioglossa lusitanica (Caudata, Salamandridae) in NW Portuga. Amphibia-Reptilia 24: 1-12
157	Brizzi, R., C. Calloni, G. Delfino and G. Tanteri. 1995. Notes on the Male Cloacal Anatomy and Reproductive Biology of Euproctus montanus (Amphibia: Salamandridae). Herpetologica 51: 8-18
158	Bovero, S., G. Sotgiu, S. Castellano and C. Giacoma. 2003. Age and Sexual Dimorphism in a Population of Euproctus platycephalus (Caudata : Salamandridae) from Sardinia. Copeia 1: 149-154
159	Funnell, S. and B. Tapley. 2009. WAZA Husbandry guidelines for Sardinian Brook Salamander: Euproctus platycephalus. FRENCH URODELA GROUP. 17. Durrell Wildlife Conservation Trust.
160	Böhme, W., B. Thiesmeier, and K. Grossenbacher. 2004. Handbuch der Reptilien und Amphibien Europas, Band 4/IIB: Schwanzlurche (Urodela) III. 390pp. Wiesbaden, Germany
161	Caetano, M.H. and J.R. Leclair. 1999. Comparative Phenology and Demography of Triturus boscai from Portugal. Journal of Herpetology 33: 192-202
162	Díaz-Paniagua, C. 2009. Tritón ibérico – Lissotriton boscai. En: Enciclopedia Virtual de los Vertebrados Españoles. Museo Nacional de Ciencias Naturales, Madrid. Available from http://www.vertebradosibericos.org/ (accessed Oct 2010)
163	Aragón, P. 2011. The response to the social environment reveals sex-dependent behavioural syndromes in the Bosca’s newt (Lissotriton boscai). Journal of Ethology 29: 79-83
164	Orizaola, G. and F. Braña. 2003. Oviposition behaviour and vulnerability of eggs to predation in four newt species (genus Triturus). Herpetological Journal 13: 121-124
165	Miaud, C. 1992. La squelettochronologie chez les Triturus (amphibiens, urodèles) à partir d’une étude de T. alpestris, T. helveticus et T. cristatus du sud-est de la France. Tissus durs et âge individuel des vertébrés, colloque national, Bondy, France. 4-6 mars 1991. 363-384
166	Temara, K. and J.-P. Jacob (Aves). 2004. Système dʼinformations sur la Biodiversité en Wallonie, observatoire de la Faune, de la Flore et des Habitats. 2011. Available from http://old.biodiversite.wallonie.be/ (accessed Oct 2010)
167	Denoël, M. and G.F. Ficetola. 2007. Landscape-level thresholds, and newt conservation. Ecological applications 17: 302-309
168	Guarino, F.M., V. Caputa and F. Angelini. 1992. The reproductive cycle of the newt Triturus italicus. Amphibia-Reptilia 13: 121-133
169	Dandová, R., K. Weidinger and V. Zavadil. 1998. Morphometric variation, sexual size dimorphism and character scaling in a marginal population of montandon s newt Triturus montandoni from The Czech Republic. Italian Journal of Zoology 65: 399-405
170	Babik, W. and J. Rafiski. 2004. Relationship between morphometric and genetic variation in pure and hybrid populations of the smooth and Montandons newt (Triturus vulgaris and T. montandoni). Journal of Zoology 262: 135-143
171	Bell, G. 1977. The Life of the Smooth Newt (Triturus vulgaris) after Metamorphosis. Ecological Monographs 47: 279-299
172	Verrell, P. and T. Halliday. 1985. Reproductive Dynamics of a Population of Smooth Newts, Triturus vulgaris, in Southern England. Herpetologica 41, 386-395
173	Dolmen, D. 1983. Growth and size of Triturus vulgaris and T. cristatus (Amphibia) in different parts of Norway. Holarctic Ecology 6: 356-371
174	Hagström, T. 1979. Population ecology of Trituras cristatus and T. vulgaris (Urodela) in SW Sweden. Holarctic Ecology 2: 108-114
175	Malmgren, J.C. and M. Thollesson. 1999. Sexual size and shape dimorphism in two species of newts, Triturus cristatus and T. vulgaris (Caudata: Salamandridae). Journal of Zoology 249: 127-136
176	Ivanovic, A., T. Vukov, G. Dzukic, N. Tomanevic and M.L. Kalezic. 2007. Ontogeny of skull size and shape changes within a framework of biphasic lifestyle: A case study in six Triturus species (Amphibia, Salamandridae). Zoomorphology 126: 173-183
177	Litvinchuk, S.N., J.M. Rosanov and L.J. Borkin. 2007. Correlations of geographic distribution and temperature of embryonic development with the nuclear DNA content in the Salamandridae (Urodela, Amphibia). Genome 50: 333-342
178	Griffiths, R.A. 1984. Seasonal behaviour and intrahabitat movements in an urban population of smooth newts, Triturus vulgaris (Amphibia: Salamandridae). Journal of Zoology 203: 241-251
179	Blab, J., P. Brüggemann and H. Sauer. 1991. Tierwelt in der Zivilisationslandschaft. Teil II: Raumeinbindung und Biotopnutzung bei Reptilien und Amphibien im Drachenfelser Ländchen. SchrReihe Landschaftspfl. Natursch 34: 1-94
180	Dolmen, D. 1981. Local migration, rheotaxis and philopatry by Triturus vulgaris within a locality in central Norway. British Journal of Herpetology 6: 151-158
181	Kinne, O. 2006. Successful re-introduction of the newts Triturus cristatus and T. vulgaris. Endangered Species Research 4: 1-16
182	Simms, C. 1969. Indications of the decline of breeding amphibians at an isolated pond in marginal land. British Journal of Herpetology 4: 93-96
183	Warwick, T. 1949. The colonization of bomb-crater ponds at Marlow, Buckinghamshire. Journal of Animal Ecology 18: 137-141
184	Özeti, N. 1967. Morphology of salamander Mertensiella luschani (Steindachner) and relationships of Mertensiella and Salamandra. Copeia 2: 287-298
185	Öz, M., S. Düþen, M.R. Tunç, Y. Kumlutaþ, H. Durmuþ and Y. Kaska. 2004. Morphological and Taxonomical Study on the Subspecies of the Lycian Salamander, Mertensiella luschani, (Steindachner, 1891) (Urodela: Salamandridae). Turkish Journal of Zoology 28: 237-244
186	Olgun, K., C. Miaud and P. Gautier. 2001. Age, growth and survivorship in the viviparous salamander Mertensiella luschani from southwestern Turkey. Canadian Journal of Zoology 79: 1559-1567
187	Özeti, N. 1979. Reproductive biology of the salamander Mertensiella luschani antalyana. Herpetologica 35: 193-197
188	Miaud, C., R. Guyetant and H. Faber. 2000. Age, size, and growth of the alpine newt, Triturus alpestris (Urodela : Salamandridae), at high altitude and a review of life history trait variation throughout its range. Herpetologica 56: 135-144
189	Denoël, M. 2005. Persistence and dispersion of an introduced population of Alpine Newt (Triturus alpestris) in the limestone plateau of Larzac (Southern France). Revue d’Écologie (la Terre and la Vie) 60: 139-148
190	Marzona, E., D. Seglie and C. Giacoma. 2004. Sexual dimorphism in body size and life-history traits in a population of Triturus alpestris alpestris. Italian Journal of Zoology Suppl. 1: 117-120
191	Joly, P. and O. Grolet. 1996. Colonization dynamics of new ponds, and the age structure of colonizing Alpine newts, Triturus alpestris. Conservation biology 15: 239-248
192	Denoël, M. 2003. Avantages sélectifs dʼun phénotype hétérochronique. Eco-éthologie des populations pédomorphiques du Triton alpestre, Triturus alpestris (Amphibia, Caudata). Cahiers d'Ethologie 23 (collection enquêtes et dossiers : 27). Cahiers dʼéthologie, France
193	Salvador, A. 2009. Gallipato – Pleurodeles waltl. En: Enciclopedia Virtual de los Vertebrados Españoles. Museo Nacional de Ciencias Naturales, Madrid. Available from http://www.vertebradosibericos.org/ (accessed Oct 2010)
194	Menage, S. 2004. Le protée (Proteus anguinus Laurenti 1768) : Historique, mythologie, biologie et utilisation en expérimentation. Thesis. 67pp. France
195	Luiselli, L., F. Andreone, D. Capizzi and C. Anibaldi. 2001. Body size, population structure and fecundity traits of Salamandra atra atra (Amphibia, Urodela, Salamandridae) population from the northeastern Italian Alps. Italian Journal of Zoology 68: 125-130
196	Bonato, L. and G. Fracasso. 2003. Movements, distribution pattern and density in a population of Salamandra atra aurorae (Caudata : Salamandridae). Amphibia-Reptilia 24: 251-260
197	Phillips, D.J. 2011. Reptiles et Amphibiens de France. Available from http://www.herpfrance.com (accessed Oct 2010)
198	Miaud, C., F. Andreone, A. Ribéron, S. De Michelis, V. Clima, J. Castanet, H. Francillon-Vieillot and R. Guyétant. 2001. Variations in age, size at maturity and gestation duration among two neighbouring populations of the Alpine salamander Salamandra lanzai. Journal of Zoology 254: 251-260
199	Andreone, F., S. De Michelis and V. Clima. 1999.A montane amphibian and its feeding habits: Salamandra lanzai (Caudata, Salamandridae) in the Alps of northwestern Italy. Italian Journal of Zoology 66: 45-49
200	Ribéron, A. and C. Miaud. 2000. Home range and shelter use in Salamandra lanzai (Caudata, Salamandridae). Amphibia-Reptilia 21: 255-260
201	Degani, G. and M.R. Warburg. 1978. Population structure and seasonal activity of adult Salamandra salamandra (L.) (Amphibia, Urodela, Salamandridae) in Israel. Journal of Herpetology 12: 437-444
202	Joly, J. 1968. Données écologiques sur la salamandre tâchetée Salamandra salamandra. Annales des Sciences Naturelles - Zoologie et Biologie Animale 12: 301-366
203	Buckley, D., M. Alcobendas, M. Garcia-Paris and M.H. Wake. 2007. Heterochrony, cannibalism, and the evolution of viviparity in Salamandra salamandra. Evolution and Development 9: 105-115
204	Catenazzi, A. 1998. Ecologie dʼune population de Salamandre tachetée au Sud des Alpes. 106pp. France
205	Schmidt, B.R., M. Schaub and S. Steinfartz. 2007. Apparent survival of the salamander Salamandra salamandra is low because of high migratory activity. Frontiers in Zoology 4: 19
206	Rebelo, R. and M.H. Leclair. 2003. Site tenacity in the terrestrial salamandrid Salamandra salamandra. Journal of Herpetology 37: 440-445
207	Angelini, C., D. Cari and C. Utzeri. 2006. Records of Salamandrina perspicillata (Savi, 1821) in the Colli Albani (Latium, central Italy), with some ecological notes (Urodela, Salamandridae). Acta Herpetologica 1: 53-60
208	Bovero, S., C. Angelini and C. Utzeri. 2006. Aging Salamandrina perspicillata (Savi, 1821) by skeletochronology. Acta Herpetologica 1, 153-158
209	Romano, A. and G.F. Ficetola. 2010. Ecogeographic variation of body size in the spectacled salamanders (Salamandrina): influence of genetic structure and local factors. Journal of Biogeography 37: 2358-2370
210	Romano, A. and F.J. Diego-Rasilla. 2008. Capacità di homing in Salamandrina perspicillata (Savi, 1821) tramite fotorecettori extaoculari. Pages 252-253. In C. Corti, editors. Herpetologia Sardiniae. Edizioni Belvedere, Latina, Italy
211	Salvidio, S. 2006. Demographic variability in two populations of the European plethodontid salamander Speleomantes strinatii. Pages 129-132. In: W. Böhme, W. Bischoff and T. Ziegler T., editors. Herpetologia Bonnensis [Proceedings of the 8th Ordinary General Meeting of the Societas Europaea Herpetologica, 23-27 August 1995, Bonn, Germany]; Societas Europaea Herpetologica; 416 pp. Bonn, Germany
212	Andreone, F. and C. Giacoma. 1989. Breeding dynamics of Triturus carnifex at a pond in northwestern Italy (Amphibia, Urodela, Salamandridae). Holarctic Ecology 12: 219-223
213	Cvetković, D., M.L. Kalezić, A. Djorović and G. Džukić. 1996. The crested newt (Triturus carnifex) in the Submediterranean: Reproductive biology, body size, and age. Italian Journal of Zoology 63: 107-111
214	Schabetsberger, R., R. Jehle, A. Maletzky, J. Pesta and M. Sztatecny. 2004. Delineation of terrestrial reserves for amphibians: post-breeding migrations of Italian crested newts (Triturus c. carnifex) at high altitude. Biological Conservation 117: 95-104
215	Arntzen, J.W. and G.P. Wallis. 1991. Restricted gene flow in a moving hybrid zone of newts (Triturus cristatus and T. marmoratus) in western France. Evolution 45: 805-826
216	Francillon-Vieillot, H., J.W. Arntzen and J. Geraudie. 1990. Age, growth and longevity of sympatric Triturus cristatus, Triturus marmoratus and their hybrids (Amphibia, Urodela). A skeletochronological study. Journal of Herpetology 24, 13-22
217	Jehle, R. and J.W. Arntzen. 2000. Post-breeding migrations of newts (Triturus cristatus, T. marmoratus) with contrasting ecological requirements. Journal of Zoology 251: 297-306
218	Kupfer, A. 1998. Wanderstrecken einzelner Kammolche (Triturus cristatus) in einem Agrarlebensraum. Zeitschrift für Feldherpetology 5: 238-242
219	Kupfer, A. and S. Kneitz. 2000. Population ecology of the great crested newt (Triturus cristatus) in an agricultural landscape: dynamics, pond fidelity and dispersal. Herpetological Journal 10: 165-172
220	Cogalniceanu, D. and C. Miaud. 2002. Age, Survival and Growth in Triturus dobrogicus (Amphibia, Urodela) from the Lower Danube Floodplain. International Association Danube Research 34: 777-783
221	Olgun, K., N. Uzum, A. Avci and C. Miaud. 2005. Age, size and growth of the Southern Crested Newt Triturus karelinii (Strauch, 1870) in a population from Bozdag (Western Turkey). Amphibia-Reptilia 26: 223-230
222	Çiçek, K., D. Ayaz and H.S. Mutlu. 2010. Data on morphology of Southern Crested Newt, Triturus karelinii (Strauch, 1870) (Caudata: Salamandridae) in Uludağ (Bursa, Turkey). Biharean Biologist 4: 103-107
223	Arntzen, J.W., T. Papenfuss, S. Kuzmin, D. Tarkhnishvili, V. Ishchenko, B. Tuniyev, M. Sparreboom, N. Rastegar-Pouyani, I.U. Ugurtas, S. Anderson, W. Babik, C. Miaud and J.I. Crnobrnja. 2008. Triturus karelinii. IUCN 2010. IUCN Red List of Threatened Species. Version 2010.4. Available from www.iucnredlist.org (accessed Oct 2010)
224	Jakob, C., C. Miaud, A.J. Crivelli and M. Veith. 2004. How to cope with periods of drought? Age at maturity, longevity and growth of marbled newts (Triturus marmoratus) in temporary Mediterranean ponds. Canadian Journal of Zoology 81: 1905-1911
225	Montori, A. 2010. Tritón jaspeado – Triturus marmoratus. En: Enciclopedia Virtual de los Vertebrados Españoles. Museo Nacional de Ciencias Naturales, Madrid. Available from http://www.vertebradosibericos.org/ (accessed Oct 2010)
226	Diaz-Paniagua, C., J.A. Mateo and A.C. Andreu. 1996. Age and size structure of populations of small marbled newts (Triturus marmoratus pygmaeus) from Donana National Park (SW Spain). A case of dwarfism among dwarfs. Journal of Zoology 239: 83-92
227	Reques, R. 2009. Tritón pigmeo – Triturus pygmaeus. En: Enciclopedia Virtual de los Vertebrados Españoles. Museo Nacional de Ciencias Naturales, Madrid. Available from http://www.vertebradosibericos.org/ (accessed Oct 2010)
228	Holbrook, J.E. 1836. North American herpetology, or, a description of the reptiles inhabiting the United States vol. 1. Philadelphia, USA. 120pp.
229	Hamilton, W.J. Jr. 1934. The rate of growth of the toad (Bufo americanus americanus Holbrook) under natural conditions. Copeia 1934:88-90.
230	Hurter, J. 1911. Herpetology of Missouri. American Museum of Natural History Library. St Louis, Missouri, USA. 274p.
231	Berven, K.A., Grudzien, T.A. 1990. Dispersal in the wood frog (Rana sylvatica): implications for genetic population structure. Evolution 44: 2047-2056.
232	United States Environmental Protection Agency. 2000. Species profiles: Woof Frog (Rana sylvatica). 8pp
